RESEARCH PAPER

# Relationships between leaf conductance to CO<sub>2</sub> diffusion and photosynthesis in micropropagated grapevine plants, before and after *ex vitro* acclimatization

Gianni Fila<sup>1,\*</sup>, Franz-W. Badeck<sup>2</sup>, Sylvie Meyer<sup>3</sup>, Zoran Cerovic<sup>3</sup> and Jaleh Ghashghaie<sup>3</sup>

<sup>1</sup> *Consiglio per la Ricerca e Sperimentazione in Agricoltura—Istituto Sperimentale per le Colture Industriali, via di Corticella 133, I-40128 Bologna, Italy*

<sup>2</sup> *Potsdam Institute for Climate Impact Research (PIK), PO Box 601203, D-14412 Potsdam, Germany*

<sup>3</sup> *Laboratoire d'Ecologie, Systématique et Evolution (ESE), CNRS-UMR 8079, Bât. 362, UFR scientifique d'Orsay, Université de Paris-XI, F-95401 Orsay Cedex, France*

Received 7 April 2006; Accepted 20 April 2006

## Abstract

*In vitro*-cultured plants typically show a low photosynthetic activity, which is considered detrimental to subsequent *ex vitro* acclimatization. Studies conducted so far have approached this problem by analysing the biochemical and photochemical aspects of photosynthesis, while very little attention has been paid to the role of leaf conductance to CO<sub>2</sub> diffusion, which often represents an important constraint to CO<sub>2</sub> assimilation in naturally grown plants. Mesophyll conductance, in particular, has never been determined in *in vitro* plants, and no information exists as to whether it represents a limitation to carbon assimilation during *in vitro* growth and subsequent *ex vitro* acclimatization. In this study, by means of simultaneous gas exchange and chlorophyll fluorescence measurements, the stomatal and mesophyll conductance to CO<sub>2</sub> diffusion were assessed in *in vitro*-cultured plants of the grapevine rootstock '41B' (*Vitis vinifera* 'Chasselas' × *Vitis berlandieri*), prior to and after *ex vitro* acclimatization. Their impact on electron transport rate partitioning and on limitation of potential net assimilation rate was analysed. *In vitro* plants had a high stomatal conductance, 155 versus 50 mmol m<sup>-2</sup> s<sup>-1</sup>

in acclimatized plants, which ensured a higher CO<sub>2</sub> concentration in the chloroplasts, and a 7% higher electron flow to the carbon reduction pathway. The high stomatal conductance was counterbalanced by a low mesophyll conductance, 43 versus 285 mmol m<sup>-2</sup> s<sup>-1</sup>, which accounted for a 14.5% estimated relative limitation to photosynthesis against 2.1% estimated in acclimatized plants. It was concluded that mesophyll conductance represents an important limitation for *in vitro* plant photosynthesis, and that in acclimatization studies the correct comparison of photosynthetic activity between *in vitro* and acclimatized plants must take into account the contribution of both stomatal and mesophyll conductance.

Key words: Acclimatization, chlorophyll fluorescence, cuticular conductance, gas exchange, grapevine, *in vitro* culture, mesophyll conductance, photosynthesis, stomatal conductance.

## Introduction

*In vitro*-cultured plants are frequently reported to be very sensitive to the abrupt environmental changes that they experience when they are removed from culture containers

\* To whom correspondence should be addressed. E-mail: gianni.fila@entecra.it

Abbreviations: *A*, net CO<sub>2</sub> assimilation rate; *A<sub>p</sub>*, net potential CO<sub>2</sub> assimilation rate at infinite *g<sub>m</sub>*; Chl, chlorophyll; *C<sub>a</sub>*, ambient CO<sub>2</sub> concentration; *C<sub>i</sub>*, intercellular CO<sub>2</sub> concentration; *C<sub>c</sub>*, CO<sub>2</sub> concentration in the chloroplasts; *g<sub>c</sub>*, cuticular conductance to H<sub>2</sub>O or CO<sub>2</sub>; *g<sub>m</sub>*, mesophyll conductance; *g<sub>s</sub>*, stomatal conductance; *F<sub>m</sub>* and *F<sub>m</sub>*, maximum yields of Chl fluorescence after dark and light exposure; *F<sub>0</sub>* and *F<sub>0</sub>*, yields of intrinsic Chl fluorescence emitted by photosystem II reaction centres in the 'open' state, after dark and light exposure, respectively; *F<sub>s</sub>*, steady-state fluorescence yield under light; *F<sub>v</sub>* and *F<sub>v</sub>*, yields of variable fluorescence after dark and light exposure; *J<sub>T</sub>*, rate of total linear electron flow; *J<sub>c</sub>*, rate of linear electron flow associated with photosynthetic carbon reduction; *J<sub>o</sub>*, rate of linear electron flow associated with photorespiratory carbon oxidation; *L<sub>i</sub>*, relative limitation to potential net CO<sub>2</sub> assimilation; PPFD, photosynthetic photon flow density; PSII, photosystem II; *R*, dark respiration; *R<sub>d</sub>*, day respiration; Rubisco, ribulose 1,5-bisphosphate carboxylase/oxygenase; *S*, Rubisco specificity factor; *S<sup>\*</sup>*, apparent Rubisco specificity factor;  $\Phi_{CO_2}$ , quantum yield of carbon assimilation;  $\Phi_{PSII}$ , quantum yield of PSII.

and placed under *ex vitro* conditions (Pospíšilová *et al.*, 1999). For this reason, an acclimatization period is normally required after *ex vitro* transplantation, during which gradual transfer to greenhouse or outdoor climatic conditions (light and relative humidity above all) are applied in order to reduce stress, and to acclimatize *in vitro* plants to the new growing conditions progressively. The success of this process is highly dependent on the extent of the morphological and/or physiological abnormalities acquired during *in vitro* growth, which may become incompatible with external life.

One of the earliest identified detrimental factors for *ex vitro* acclimatization is the poor photosynthetic capacity of *in vitro* plants (Donnelly and Vidaver, 1984; Grout, 1988). This limitation arises from the low light and the restricted supply of CO<sub>2</sub> imposed by the confined microenvironment (Solárová, 1989; Kozai, 1991; Chaves, 1994; Arigita *et al.*, 2002), and the down-regulation brought about by the addition of exogenous sugars to the nutrient media (Capellades *et al.*, 1991; Lees *et al.*, 1991; Hdider and Desjardins, 1994; Serret *et al.*, 1997).

From a survey of the literature on this subject, it was noticed that the approach followed by most studies on *ex vitro* acclimatization is to compare the effect of various culture conditions [e.g. variation of photosynthetic photon flow density (PPFD), CO<sub>2</sub>, sugars in the nutrient media], before and/or after *ex vitro* transplantations. Comparison of photosynthetic capacity is typically made on a net assimilation basis, most often neglecting the fact that carbon assimilation also depends on the availability of CO<sub>2</sub> at the carboxylation sites, which is restricted by the resistances to diffusion along the pathway from the atmosphere to the chloroplasts. Photosynthesis tends to be considered essentially as a biochemical or photochemical issue, even when treatments known to affect leaf conductances, such as CO<sub>2</sub> enrichment (Singsaas *et al.*, 2003), are applied. In fact, a well-established notion in ecophysiological research on naturally grown plants is that overlooking the contribution of leaf conductance leads to over- or under-estimation of the real carbon assimilating capacity, with the inevitable misinterpretations of results.

The objective of this study was 2-fold: (i) to assess the leaf conductances to CO<sub>2</sub> diffusion and their contribution to photosynthesis in *in vitro*-cultured plants; and (ii) to check whether changes in CO<sub>2</sub> diffusion are part of the acclimatization to *ex vitro* conditions.

While information exists about stomatal conductance in *in vitro* plants, which is usually reported to be very high, nothing is known about the limitation to CO<sub>2</sub> diffusion inside the leaf.

Special attention has therefore been reserved for this latter one, for which a series of simultaneous fluorescence and gas exchange measurements were undertaken on *in vitro* and greenhouse-acclimatized plants of the grapevine rootstock '41B' (*Vitis vinifera* 'Chasselas' × *Vitis berlandieri*).

Beyond the usual gas exchange parameters (net assimilation rate and stomatal conductance), the combined measurements allowed estimation of electron transport rate partitioning and the assessment of mesophyll conductance to CO<sub>2</sub>.

The results are expected to fill a knowledge gap in the photosynthetic physiology in *in vitro*-cultured plants, and to support a more consistent interpretation of photosynthesis measurements in acclimatization studies.

## Materials and methods

### General experimental set-up

All experiments were conducted on two sets of plants: (i) *in vitro*-cultured plants, before *ex vitro* acclimatization (henceforth referred to as 'in vitro plants'); and (ii) *in vitro*-cultured plants after *ex vitro* acclimatization (henceforth referred to as 'acclimatized plants').

Simultaneous gas exchange and chlorophyll fluorescence measurements were applied in order to observe net assimilation rate and to estimate stomatal and mesophyll conductances. According to the methodology used (Epron *et al.*, 1995), determination of mesophyll conductance required the previous estimation of electron transport rate partitioning, which was achieved by means of the method described by Genty *et al.* (1989). This method utilizes the close correspondence between the actual quantum yield of photosystem II (PSII) photochemistry,  $\Phi_{\text{PSII}}$ , and the actual quantum yield of carbon assimilation,  $\Phi_{\text{CO}_2}$ , as a relative measurement of electron transport rate. A dedicated set of experiments was therefore run in order to 'calibrate' this relationship on the present plant material.

Two other complementary sets of experiments were run to measure the optical properties of the leaves and the cuticular conductance to CO<sub>2</sub>. One leaf was sampled per individual plant. Five replicates for each treatment were used in the measurements of leaf optical properties and in the gas exchange/fluorescence experiments, while three replicates were used for the assessment of cuticular conductance.

### Plant material and culture conditions

All experiments were conducted on the grapevine rootstock, '41B' (*Vitis vinifera* 'Chasselas' × *Vitis berlandieri*). Nodal cuttings were cultured for 30 d in 25 × 250 mm tubes, covered with a loose metallic cap, and containing 20 ml of solidified nutrient medium (Charles, 1992) with 25 g l<sup>-1</sup> sucrose. Growth room conditions were constant temperature, 27 ± 1 °C, with a 12 h photoperiod at a PPFD of 60 μmol m<sup>-2</sup> s<sup>-1</sup> provided by cool-white fluorescent lamps (Osram, Munich, Germany). Acclimatization to *ex vitro* conditions was conducted as follows: 4-week-old *in vitro* plants were transferred to the greenhouse in pots filled with a peat and sand mixture 1:1 (v/v), and kept in a PVC [poly(vinyl chloride)] box with a semi-transparent cover to avoid desiccation. After 1 week, the cover was removed, and the plants were grown in a temperature-controlled greenhouse (max. PPFD: 600 μmol m<sup>-2</sup> s<sup>-1</sup>; day/night temperature: 26/12 °C).

Measurements on *in vitro* plants were carried out after 4 weeks from the last subculture, when there were four to six fully expanded leaves and a developed root system, whereas on acclimatized plants measurements were carried out 2 months after *ex vitro* transplantation.

### Optical properties of the leaves and chlorophyll determination

Leaf absorption spectra were measured in the visible (400–700 nm) light range, using an integrating sphere (LI-1800-12S, Li-Cor, Inc., Lincoln, NE, USA) coupled to a spectroradiometer SE590 (Spectron Engineering, Denver, CO, USA). The concentration of chlorophyll

pigments was determined on the same leaf samples after extraction in *N,N*-dimethylformamide according to Moran (1982).

#### Gas exchange and chlorophyll fluorescence measurements

Measurements were carried out on the youngest fully developed leaves. Since *in vitro* plant leaves typically show a rapid wilting when they are taken out of the tubes, their stem was cut under water, just above the root insertion zone, and then kept in a tube filled with distilled water during the measurements. This procedure allowed water to flow directly into the stem, and was effective in preserving leaves from dehydration during the experiments (Fila *et al.*, 1998).

Coupled gas exchange and chlorophyll fluorescence emission measurements were carried out in an open system as described by Ghashghaie and Cornic (1994). This consisted of a thermostated leaf assimilation chamber with a section area of 1.7 cm<sup>2</sup>, which was entirely covered by leaves of both types of plants, and a gas volume of 6.4 ml. In- and outgoing air passed separately through a one-channel infrared gas analyser (Binos; Leybold Heraeus, Hanau, Germany) and a dew-point hygrometer (Elcowa électronique, Mulhouse France; system 1100 DP) for CO<sub>2</sub> and H<sub>2</sub>O partial pressure measurements. Air flow rate was set at 20 l h<sup>-1</sup>. Actinic light was provided by a slide projector, and light intensity was modulated through neutral density filters. The actual PPFD was measured with a Li-190 Li-Cor quantum sensor.

*In vivo* chlorophyll fluorescence emission from the upper leaf surface was measured with a chlorophyll pulse-amplitude modulation fluorometer (PAM-101, H. Walz, D-8521 Effeltrich, Germany), connected to the assimilation chamber window through a branched fibre-optic system, based on the one described by Dietz *et al.* (1985). The frequency of modulated light was 1.6 kHz, and saturating flash pulses (1 s) of white light (12 000 μmol m<sup>-2</sup> s<sup>-1</sup>) were provided by a KL 1500 Schott light source (Schott, Wiesbaden, Germany).

Three fluorescence levels were measured:  $F_0$ ,  $F_s$ , and  $F_m$  ( $F'_m$  under illumination; Maxwell and Johnson, 2000). From these measurements the actual quantum yield of PSII photochemistry,  $\Phi_{PSII}=(F'_m-F_s)/F'_m$  was calculated (Genty *et al.*, 1989).

#### Light and CO<sub>2</sub> responses

A light response curve was established to assess net assimilation rate and leaf conductances to CO<sub>2</sub>, which were recorded at light saturation, and the electron transport rate partitioning.

After measuring dark respiration, the light was switched on, and light-response curves were recorded in the PPFD range between 0 and 600 μmol m<sup>-2</sup> s<sup>-1</sup>, at either 0.21 mol O<sub>2</sub> mol<sup>-1</sup> air (i.e. 21% O<sub>2</sub>) and 350 μmol CO<sub>2</sub> mol<sup>-1</sup> air (normal air) or 0.01 mol O<sub>2</sub> mol<sup>-1</sup> air (i.e. 1% O<sub>2</sub>) and 600 μmol CO<sub>2</sub> mol<sup>-1</sup> air (non-photorespiratory conditions).

An intercellular CO<sub>2</sub> ( $C_i$ )-response curve was established to determine  $S^*$ , the apparent  $S$ , for the estimation of  $C_c$  (CO<sub>2</sub> concentration in the chloroplasts) and  $g_m$  (mesophyll conductance) according to the model of Epron *et al.* (1995). CO<sub>2</sub> was varied in the range where Rubisco activity is limiting for photosynthesis, i.e. below 500 μmol CO<sub>2</sub> mol<sup>-1</sup>, air at a PPFD of 200 μmol m<sup>-2</sup> s<sup>-1</sup> and where the relationship against  $C_i$  is linear. The chosen PPFD intensity was at the limit or below the saturated region of the light-response curve of *in vitro* plants and acclimatized plants, respectively. CO<sub>2</sub> partial pressure was varied by mixing different ratios of CO<sub>2</sub>-free air with compressed air containing 10% CO<sub>2</sub>.

#### Measurements of cuticular conductance

Substomatal CO<sub>2</sub> concentration,  $C_i$ , was calculated according to the model of von Caemmerer and Farquhar (1981). This model ignores the contribution of cuticular transpiration to the leaf gas exchange, thus allowing a simplified calculation of  $C_i$ . This assumption proved

to be actually valid in most situations, but it is questionable for *in vitro* plants, where the effectiveness of cuticle on transpiration control has been debated (Wetzstein and Sommer, 1982; Sutter, 1988). In order to check the consistency of the  $C_i$  simplified calculation, especially for *in vitro* plants, an additional series of measurements was carried out to assess the value of cuticular conductance ( $g_c$ ).

Grapevine leaves are hypostomatous, hence transpiration from the upper surface occurs only through the cuticle. Using the same gas exchange apparatus, the conductance from the upper leaf surface was measured by isolating the lower surface with a self-adhesive transparent plastic ribbon. Measurements were conducted at a PPFD of 200 μmol m<sup>-2</sup> s<sup>-1</sup> and 350 μmol mol<sup>-1</sup> CO<sub>2</sub>, at a vapour pressure deficit varying between 0.5 and 2.5 kPa (in all the other light- and CO<sub>2</sub>-response measurements the vapour pressure deficit was always between 0.7 and 1.0 kPa). The measured conductance was taken as the value of  $g_c$ , although this implied the further assumption that the gas exchange properties of the cuticles are identical for both epidermises. Since the cuticle discriminates against CO<sub>2</sub>,  $g_c$  for CO<sub>2</sub> was finally estimated as 15% of  $g_c$  for water vapour (Boyer *et al.*, 1997).

#### Non-cyclic electron flow analysis

Simultaneous measurement of fluorescence yield and CO<sub>2</sub> exchange under non-photorespiratory conditions made it possible to estimate the rate of photosynthetic electron flow  $J_T$  according to Genty *et al.* (1989), who found a linear relationship between the quantum yield of PSII,  $\Phi_{PSII}$ , and the quantum yield of CO<sub>2</sub> assimilation ( $\Phi_{CO_2}$ ) under non-photorespiratory conditions. This relationship allows  $\Phi_{PSII}$  to be utilized as a relative measure of the whole chain photosynthetic electron transfer. A good linear correlation was obtained for both *in vitro* and acclimatized plants (Fig. 1). The two relationships were found to be statistically different with the ANCOVA test ( $P=0.05$ ), which rejected the homogeneity of regression slope assumption. Both equations [ $\Phi_{PSII}=11.55\Phi_{CO_2}-0.02$  (acclimatized plants) and  $\Phi_{PSII}=9.24\Phi_{CO_2}+0.01$  (*in vitro* plants)] were therefore used.

The total electron transport rate  $J_T$  was then calculated (Cornic and Briantais, 1991):

$$J_T = 4[(\Phi_{PSII} - b)/a]PPFD$$

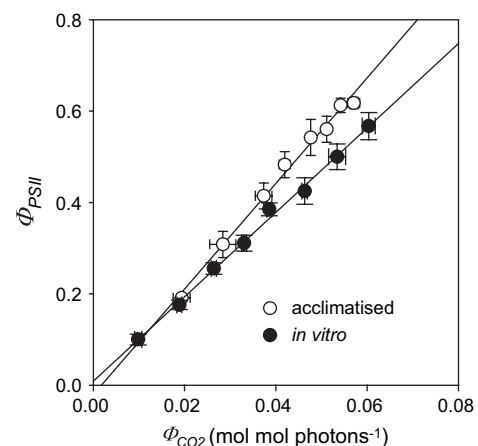

**Fig. 1.** The relationship between the quantum yield of CO<sub>2</sub> assimilation ( $\Phi_{CO_2}$ =gross assimilation rate/incident PPFD) and the photochemical yield of PSII [ $\Phi_{PSII}=(F'_m-F_s)/F'_m$ ] in acclimatized (open circles) and *in vitro* plants (closed circles). Measurements were taken at various PPFD under 0.01 mol O<sub>2</sub> mol<sup>-1</sup> air and 600 μmol CO<sub>2</sub> mol<sup>-1</sup> air. The bars indicate standard errors ( $n=5$ ).

with  $a$  and  $b$  being, respectively, the slope and the ordinate axis intercept of the relationship between  $\Phi_{\text{PSII}}$  and  $\Phi_{\text{CO}_2}$ . The whole expression is multiplied by 4, which accounts for the number of electrons, which must be transported to reduce one molecule of  $\text{CO}_2$ .

By adopting the model of Epron *et al.* (1995), it was possible to estimate the partitioning of the total electron flow,  $J_T$ , into two fractions:  $J_c$ , the electron flow associated with  $\text{CO}_2$  reduction, and  $J_o$ , the flow funnelled into collective  $\text{O}_2$ -dependent dissipative processes, such as photorespiration and the Mehler reaction. The calculation required the knowledge of the day respiration ( $R_d$ ), which is usually estimated by the respiration rate measured in the dark,  $R$ . This represents a simplification, since it has been well established that mitochondrial respiration is partly inhibited in the light (Brooks and Farquhar, 1985; Atkin *et al.*, 2000). It was therefore assumed that day respiration is 50% of the respiration measured in the dark. This value was chosen because it was intermediate to the range of variation reported in the literature (between 16% and 77%, as reported by Atkin *et al.*, 2000).

### Mesophyll conductance determination

The estimation of mesophyll conductance was performed following the approach of Epron *et al.* (1995). These authors determined *in vivo* an apparent specificity factor of Rubisco ( $S^*$ ), as the slope of the linear regression between  $J_c/J_o$  and the ratio between  $C_i$  and atmospheric  $\text{O}_2$ :

$$J_c/J_o = S([\text{CO}_2]/[\text{O}_2])$$

Ideally,  $S^*$  will correspond to the true specificity factor value ( $S$ ) if  $g_m$  is infinite. Under a non-infinite  $g_m$ ,  $S^*$  will be lower than  $S$ , which is a species-specific, highly conserved parameter for the Rubisco of higher plants (Long and Bernacchi, 2003).

From the comparison of  $S^*$  to  $S$ , measured *in vitro* on the purified enzyme, it is possible to compute the actual  $\text{CO}_2$  concentration in the chloroplast ( $C_c$ ) by means of the following relationship:

$$C_c = C_i(S^*/S)$$

As the 'true'  $S$  for grapevine, a reference value of 2700 was used. This was derived, after unit conversion, from the value obtained experimentally on two grapevine cultivars by Bota *et al.* (2002) by *in vitro* assays.

After  $C_c$  calculation, the mesophyll conductance ( $g_m$ ) was computed at light saturation and ambient  $\text{CO}_2$  ( $350 \mu\text{mol mol}^{-1}$ ) with the relationship:

$$g_m = A(C_i - C_c)$$

where  $A$  is the net  $\text{CO}_2$  assimilation rate. The final  $g_m$  estimate was the average of five values independently calculated on separate leaves. Calculating  $C_c$  also made it possible to estimate the relative limitation to photosynthesis ( $L_i$ ) which can be ascribed to mesophyll conductance. This latter limitation was quantified as the relative difference between the net potential assimilation rate ( $A_p$ ), i.e. the one that would have been obtained with an infinite  $g_m$  ( $C_c=C_i$ ) and the actually observed net assimilation rate ( $A$ ) at the given  $C_c$ , lower than  $C_i$  (see Fig. 2B, and relative comments in the Results):

$$L_i = 1 - (A/A_p)$$

$A$  and  $A_p$  were determined at the ambient  $\text{CO}_2$  concentration,  $350 \mu\text{mol mol}^{-1}$ , by graphical interpolation on the  $A/C_c$  plot (Jones, 1973), redrawn from the  $A/C_i$  plot using the corresponding  $C_c$  values in place of  $C_i$ .  $A_p$  was found on the curve at the  $\text{CO}_2$  concentration corresponding to  $C_i$  ( $=C_c$  value with  $g_m$  infinite), while  $A$  was found at the actual  $C_c$ .

### Sensitivity analysis

The estimation of  $C_c$  and  $g_m$  was made ignoring  $g_c$ , and using postulated values for  $R_d$  and  $S$ . A sensitivity analysis was therefore undertaken to assess to what extent these estimates were sensitive to the uncertainty associated with these assumptions.

Estimates of  $C_c$  and  $g_m$  were recalculated from a wide sample of combinations of  $g_c$ ,  $R_d$ , and  $S$ , where each factor was allowed to vary across the entire range of its variation interval. The variability thus generated represented a scenario of 'total uncertainty' against which the relative weight of each factor was assessed. This was done by eliminating in turn the variability associated with each factor, by extracting a subset of combinations containing its postulated value ( $g_c=0$ ,  $R_d=50\%$  of  $R$ ,  $S=2700$ ) and observing how the entire variability was affected.

## Results

### Chlorophyll content and optical properties

Total chlorophyll content, expressed on a leaf area basis, was not statistically different between *in vitro* and acclimatized plants at a 5% error level (Student's *t*-test,  $n=5$ ).

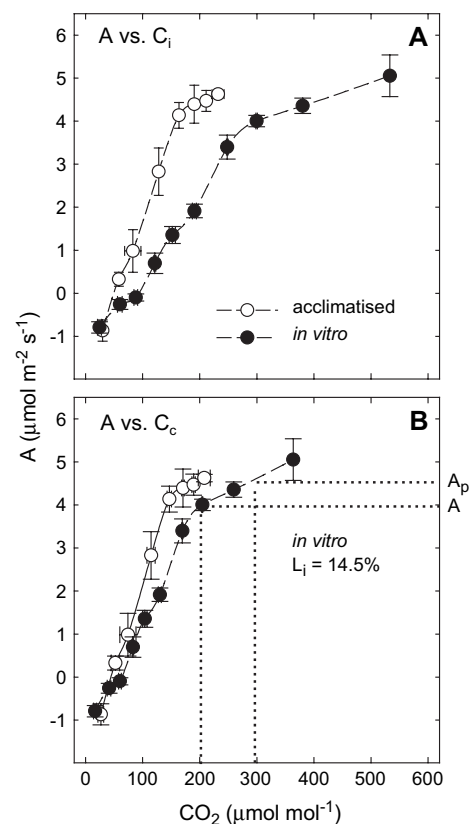

**Fig. 2.** Leaf net  $\text{CO}_2$  assimilation of *in vitro* (closed circles) and acclimatized (open circles) grapevine plants measured at varying  $\text{CO}_2$  concentrations under a PPFD of  $200 \mu\text{mol mol}^{-1}$  and  $0.21 \text{ mol O}_2 \text{ mol}^{-1}$  air. Measurements were carried out only for subsaturating  $\text{CO}_2$  concentrations to assess the apparent Rubisco specificity factor. (A) Net assimilation ( $A$ ) is plotted against intercellular  $\text{CO}_2$  ( $C_i$ ); (B) net assimilation is plotted against  $\text{CO}_2$  concentration in the chloroplasts ( $C_c$ ).  $A_p$  is the potential net assimilation rate occurring at  $C_c=C_i$ . The bars indicate standard errors ( $n=5$ ).

The ratios between Chl *a* and Chl *b* were similar and lower than 2, characteristic of shade plants (Table 1). Light absorption spectra were identical in both cases (not shown). The coefficient of light absorption in the photosynthetically active radiation range (400–700 nm) was 0.780 for both types of plants.

### Net leaf CO<sub>2</sub> exchange

Leaves of acclimatized plants had a higher net CO<sub>2</sub> assimilation rate measured under saturating light. In an atmosphere containing 0.21 mol O<sub>2</sub> mol<sup>-1</sup> air (normal air) the recorded values were 4.1±0.20 against 6.1±0.67 μmol m<sup>-2</sup> s<sup>-1</sup> in *in vitro* and acclimatized plants, respectively. Under non-photorespiratory conditions the respective values were 6.5±0.48 against 11.6±0.73 μmol m<sup>-2</sup> s<sup>-1</sup> (Table 2), and the maximum quantum yield of net CO<sub>2</sub> uptake by leaves (the slope of the A/PPFD curve) was almost identical at 0.072 and 0.070 mol CO<sub>2</sub> mol absorbed photons<sup>-1</sup> (not shown), which is very close to the mean value found in a wide range of C<sub>3</sub> plants by Long *et al.* (1993).

Measurements of the A/C<sub>i</sub> response provided evidence that the carboxylation efficiency, the slope of the linear part of the curve, was higher for leaves of greenhouse-acclimatized plants, which also showed a lower CO<sub>2</sub> compensation point (Fig. 2A).

### Cuticular conductance

Leaf conductance to water vapour diffusion of the upper leaf surface was 20.6 for *in vitro* plants and 4.5 mmol m<sup>-2</sup> s<sup>-1</sup> for acclimatized plants, while the sums of cuticular and stomatal conductances, measured on the lower surface, were 142.4 and 46.4 mmol m<sup>-2</sup> s<sup>-1</sup> in *in vitro* and acclimatized plants, respectively. That means that in acclimatized plants, cuticular transfer conductance to water vapour was 9.6% of leaf conductance, while in *in vitro* plants it was 14.5%. On the hypothesis that the ratio of

**Table 1.** Total chlorophyll content and the Chl *a*/Chl *b* ratio determined on *in vitro*-grown grapevine plants before and after *ex vitro* acclimatization (*n*=5, means ± standard error)

No significant differences were found (Student's *t* test).

|                 | Chl <i>a</i> +Chl <i>b</i> (mg m <sup>-2</sup> ) | Chl <i>a</i> /Chl <i>b</i> (mol mol <sup>-1</sup> ) |
|-----------------|--------------------------------------------------|-----------------------------------------------------|
| <i>In vitro</i> | 150.0±15.0                                       | 1.93±0.108                                          |
| Acclimatized    | 125.0±10.0                                       | 1.90±0.175                                          |

**Table 2.** Net assimilation rate and electron transport rate at PPFD saturation and ambient CO<sub>2</sub> (350 μmol mol<sup>-1</sup>)

Net assimilation rate was measured at 21% and 1% O<sub>2</sub> (*n*=5, means ± standard error).

|                 | A <sub>max</sub> 21% O <sub>2</sub> | A <sub>max</sub> 1% O <sub>2</sub> | J <sub>T</sub> | J <sub>c</sub> | J <sub>o</sub> | J <sub>c</sub> /J <sub>T</sub> (%) |
|-----------------|-------------------------------------|------------------------------------|----------------|----------------|----------------|------------------------------------|
| <i>In vitro</i> | 4.1±0.20                            | 6.5±0.48                           | 29.9±1.56      | 22.4±0.70      | 7.5±1.02       | 74.8                               |
| Acclimatized    | 6.1±0.67                            | 11.6±0.73                          | 55.3±1.75      | 37.4±1.19      | 17.9±0.83      | 67.6                               |

gas permeabilities of the cuticle is identical to the ratio of the diffusivities of CO<sub>2</sub> and H<sub>2</sub>O in air, g<sub>c</sub>(CO<sub>2</sub>) would be 12.9 and 2.8 mmol m<sup>-2</sup> s<sup>-1</sup> in *in vitro* plants and acclimatized plants, respectively (Table 3). Introducing these g<sub>c</sub> values to the estimation of C<sub>i</sub>, and considering a 15% value of the ratio g<sub>c</sub>(CO<sub>2</sub>)/g<sub>c</sub>(H<sub>2</sub>O), due to the cuticle discrimination effect against CO<sub>2</sub> (Boyer *et al.*, 1997), the deviation from the simplified C<sub>i</sub> estimation was -1.15% in acclimatized plants and -0.65% in *in vitro* plants. For this reason, the simplified estimates were maintained in all subsequent calculations.

### Electron transport rate partitioning

In acclimatized plants J<sub>T</sub> saturated at a PPFD of 350 μmol m<sup>-2</sup> s<sup>-1</sup> at a maximum value of 55.3 μmol m<sup>-2</sup> s<sup>-1</sup>, where 67.6% of the total electron flow was funnelled towards the CO<sub>2</sub> reduction pathway. In *in vitro* plants, J<sub>T</sub> was inferior to that recorded on acclimatized plants: at light-saturation; above 200 μmol m<sup>-2</sup> s<sup>-1</sup> PPFD, it was 29.9 μmol m<sup>-2</sup> s<sup>-1</sup>. The proportion diverted to J<sub>c</sub> was 74.8% of J<sub>T</sub> (Table 2).

### Mesophyll conductance

The apparent Rubisco specificity factor S\* was 1801 (S\*/S=0.67) in *in vitro* plants and 2411 (S\*/S=0.89) in acclimatized plants (not shown). At the ambient external CO<sub>2</sub> concentration of 350 μmol mol<sup>-1</sup> and at light saturation, C<sub>c</sub> was 195.3±1.15 μmol mol<sup>-1</sup> in *in vitro* plants, i.e. 55.8% of C<sub>a</sub>, and 66.7% of C<sub>i</sub>. In acclimatized plants C<sub>c</sub> was 168.2±2.71 μmol mol<sup>-1</sup>, 89.3% of C<sub>i</sub>, and 48.0% of C<sub>a</sub> (Table 3).

The maximum carboxylation efficiency, determined on the initial slope of the A/C<sub>c</sub> curve (Fig. 2B), was +73.8% higher (0.0168 versus 0.0292 mol m<sup>-2</sup> s<sup>-1</sup>) than the value determined on a C<sub>i</sub> basis in *in vitro* plants, while in acclimatized plants the change was +12.1% (0.0371 versus 0.0416 mol m<sup>-2</sup> s<sup>-1</sup>; Fig. 2).

Mesophyll conductance was 42.8 ± 1.38 and 285.4 ± 11.31 mmol m<sup>-2</sup> s<sup>-1</sup> for *in vitro* and acclimatized plants, respectively (Table 3).

The relative photosynthesis limitation (L<sub>i</sub>) due to g<sub>m</sub> led to a 14.5% decrease with respect to the potential net assimilation rate in *in vitro* plants (Fig. 2B). For acclimatized plants the calculated L<sub>i</sub> was 2.1%.

### Sensitivity analysis

The variability associated to g<sub>c</sub>, R<sub>d</sub>, or S was compared with the total uncertainty variability by means of cumulative

frequency distributions of  $C_c$  and  $g_m$  obtained. When the full range of uncertainty for  $g_c$ ,  $S$ , and  $R_d$  was considered, 95% of  $C_c$  estimates varied between 162 and 274  $\mu\text{mol mol}^{-1}$  in *in vitro* plants, and between 147 and 193  $\mu\text{mol mol}^{-1}$  in acclimatized plants (Fig. 3). In both treatments, the  $C_c$  distribution was almost the same in the subsets with fixed  $R_d$  or  $g_c$ , while in the fixed  $S$ -subset the variability was reduced to the interval 177–212  $\mu\text{mol mol}^{-1}$  in *in vitro* plants. In acclimatized plants no particular effect of constant  $S$  on the frequency distribution was noticeable.

A different situation was observed in the  $g_m$  dataset, where the highest variability for the total uncertainty

**Table 3.** Stomatal and mesophyll conductances, leaf internal  $\text{CO}_2$  concentrations (substomatal,  $C_b$ , and chloroplastic,  $C_c$ ),  $C_i/C_a$ , and the ratio  $J_c/J_T$  (electron transport rate associated with carbon reduction/total electron transport rate) in *in vitro* and acclimatized plants, at ambient  $\text{CO}_2$  ( $350 \mu\text{mol mol}^{-1}$ ) and light saturation ( $n=5$ , means  $\pm$  standard error)

|                                                                | <i>In vitro</i>  | Acclimatized      |
|----------------------------------------------------------------|------------------|-------------------|
| $g_s$ ( $\text{CO}_2$ ) ( $\text{mmol m}^{-2} \text{s}^{-1}$ ) | 155 $\pm$ 13.3   | 50 $\pm$ 6.0      |
| $g_c$ ( $\text{CO}_2$ ) ( $\text{mmol m}^{-2} \text{s}^{-1}$ ) | 12.9 $\pm$ 1.07  | 2.8 $\pm$ 0.36    |
| $g_m$ ( $\text{mmol m}^{-2} \text{s}^{-1}$ )                   | 42.8 $\pm$ 1.38  | 285.4 $\pm$ 11.31 |
| $C_i$ ( $\mu\text{mol mol}^{-1}$ )                             | 292.8 $\pm$ 1.73 | 188.4 $\pm$ 3.0   |
| $C_c$ ( $\mu\text{mol mol}^{-1}$ )                             | 195.3 $\pm$ 1.15 | 168.2 $\pm$ 2.71  |
| $C_c/C_i$ (%)                                                  | 66.7             | 89.3              |
| $C_c/C_a$ (%)                                                  | 55.8             | 48.0              |
| $J_c/J_T$ (%)                                                  | 74.8             | 67.6              |

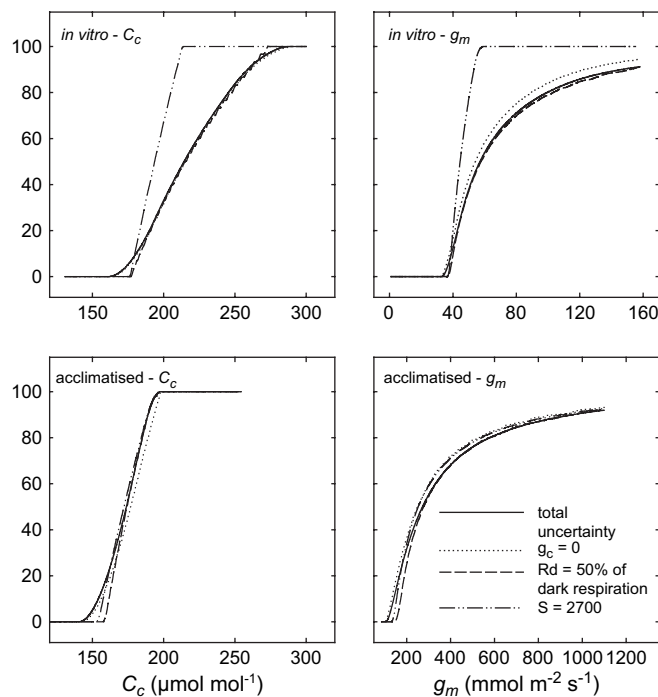

**Fig. 3.** Sensitivity analysis. Frequency distributions of  $\text{CO}_2$  concentration in the chloroplasts ( $C_c$ ) and mesophyll conductance ( $g_m$ ) estimated under 'full uncertainty' conditions (continuous lines), or taking in turn  $g_c=0$  (dotted lines),  $R_d=50\%$  of  $R$  (dashed lines) or  $S=2700$  (dot-dash lines).

scenario was observed in acclimatized plants, with 95% of combinations ranging between 120 and 2595  $\text{mmol m}^{-2} \text{s}^{-1}$ , and between 33 and 368  $\text{mmol m}^{-2} \text{s}^{-1}$  in *in vitro* plants. Even in this case, taking a fixed  $S$  value remarkably reduced the variability into the interval 38–56  $\text{mmol m}^{-2} \text{s}^{-1}$  in *in vitro* plants, while in acclimatized plants none of the factors when taken individually could attenuate the overall variability.

## Discussion

The objective of this study was to determine to what extent photosynthesis in *in vitro*-cultured plants is limited by constraints to  $\text{CO}_2$  diffusion in the leaves, and in particular by mesophyll conductance, which had never been determined on *in vitro* plants up to then. The analysis utilized methodologies well established for naturally grown plants, but which were never tested on *in vitro*-cultured plants. It was therefore necessary to dedicate part of the work to verify the consistency of the principal assumptions involved in the procedures. The aspects that needed particular attention were the incidence of cuticular conductance, the relationships between chlorophyll fluorescence and the electron transport rate (Genty's plot), and the postulated values of  $S$  and  $R_d$ .

### Cuticular conductance

A higher  $g_c$  in *in vitro* plants was hypothesized on the ground of microscopic observations reporting thin or absent cuticle for *in vitro* plants (Wetzstein and Sommer, 1982; Sutter, 1988). However, direct measurements of  $g_c$  were similar to that recorded on outdoor grown plants (Fuchigami *et al.*, 1981; Shackel *et al.*, 1990; Santamaria and Kerstiens, 1994). This is not in contradiction with the microscopic results, since it has been established that cuticular permeability to gases is not related to its thickness (Kerstiens, 1996). It was found that  $g_c$  to  $\text{H}_2\text{O}$  was 14% of total leaf conductance ( $g_s+g_c$ ) for *in vitro* plants and below 10% for acclimatized plants. Considering that  $g_c$  to  $\text{CO}_2$  is much inferior to that for  $\text{H}_2\text{O}$ —well below at 13% according to Boyer *et al.* (1997)—it was found that the effect of  $g_c$  on  $C_i$  and subsequent  $g_m$  estimation, was negligible.

### Genty's relationship

Estimation of electron transport rate was based on the relationship between  $\Phi_{\text{PSII}}$  and  $\Phi_{\text{CO}_2}$ , which was linear for both *in vitro* and acclimatized plants, but was characterized by a different regression equation. An effect of leaf optical properties can be excluded, as the light absorption spectra were perfectly coincident in the visible region (data not shown), and the chlorophyll content was not different either (Table 1).

The difference in the regression could be related to the different thickness of the leaf. It is known that the

fluorescence signal is detected only from the superficial layers of cells, while all the layers across the whole leaf thickness contribute to the gas exchange measured (Maxwell and Johnson, 2000; Tsuyama *et al.*, 2003). For a given  $\Phi_{\text{PSII}}$ , a lower  $\Phi_{\text{CO}_2}$  would be expected from a thicker leaf, where gradients in light distribution and CO<sub>2</sub> assimilation activity may establish, and this is precisely what was observed (Fig. 1).

#### Sensitivity against $R_d$ and $S$ assumptions

The consistency of the postulated values of  $R_d$  and  $S$  was verified through a sensitivity analysis. In *in vitro* plants,  $S$  was the parameter with the highest effect in reducing the uncertainty of  $C_c$  and  $g_m$  estimates while, in acclimatized plants, none of the factors, individually taken, was able to ameliorate the accuracy of the estimates. In any case, even under full uncertainty conditions, the variability of the estimates for *in vitro* plants was narrower than that for acclimatized plants (Fig. 3). This behaviour could be explained as follows: the function yielding  $g_m$  is hyperbolic since it has  $(C_i - C_c)$  as the denominator, which was calculated for a range of  $R_d$  values (Fig. 4). This means that the same relative variation of  $(C_i - C_c)$  results in different relative variations of  $g_m$ , whether this falls in the horizontal or in the vertical asymptotic region of the function. In acclimatized plants, due to lower  $C_i$  values, the  $(C_i - C_c)$  difference tends to be closer to 0. Under these conditions, small variations of  $R_d$  (which affects  $S^*$ , then  $C_c$ ) or small experimental inaccuracies in gas exchange measurement are sufficient to induce very large variations in  $g_m$  (Fig. 4). This intrinsic instability of the estimations explains why taking one fixed factor at a time is not sufficient to reduce the overall variability. However, precise knowledge of  $g_m$  when this is very high is of little practical importance, since in this case it is more convenient to approximate  $C_i = C_c$  and ignore  $g_m$ .

All this considered, it was concluded that *in vitro* plants showed a weak  $g_m$ , reasonably contained in the interval 38–56  $\mu\text{mol m}^{-2} \text{s}^{-1}$ , which proved to be an appreciable limitation for CO<sub>2</sub> diffusion in *in vitro* leaves and

for photosynthesis (Fig. 2B). After acclimatization,  $g_m$  increases, and its limitation effect is reduced.

#### Relationship between $g_s$ – $g_m$ and photosynthetic activity

Over the past decades, studies on *in vitro* plants often presented large discrepancies in characterizing their photosynthetic ability and its impact on *ex vitro* acclimatization. Desjardins *et al.* (1995) pointed out that many of these discrepancies, previously attributed to intrinsic species-specific photosynthetic characteristics (Grout, 1988), were more explainable by the high variability in the culture conditions and measuring techniques adopted, which made it difficult to compare and generalize results.

On the base of the present results, it is proposed that neglecting leaf conductances to CO<sub>2</sub> diffusion could have represented an additional source of ambiguity in interpreting photosynthesis measurements in *in vitro*-cultured plants. In the first place, whenever stomatal conductance is very high, which is a frequent occurrence in *in vitro* plants, any gas exchange measurement carried out under normal air should take into account that the assimilation rate is affected by partial photorespiration suppression. This effect could explain why *in vitro* plants were sometimes found to have a higher photosynthesis than *ex vitro* plants, as in the study by Lee *et al.* (1985) who reported that *in vitro* plants of *Liquidambar styraciflua* had a higher net carbon assimilation than seedlings of the same species grown under the same light conditions. De *et al.* (1992) also recorded a superior photosynthesis rate in *in vitro* *Asparagus* plants compared with acclimatized ones grown at higher irradiances. As far as is known, only these latter authors, together with Pospíšilová *et al.* (1998), recognized that carbon assimilation in *in vitro* plants was favoured by a high stomatal conductance, but they did not provide a quantitative estimate of its contribution.

The effect of  $g_s$  should be analysed together with  $g_m$ , which is not predictable and is much more difficult to measure. A special caution is especially necessary when comparing photosynthetic characteristics between treatments potentially affecting  $g_m$ . An example of these treatments is represented by CO<sub>2</sub> enrichment (Singsaas *et al.*, 2003), which is one of the most frequently applied in *in vitro* culture research. Also sugar treatments, which have an impact on leaf morphology, might well affect leaf conductance beyond biochemical effects.

## Conclusions

At the time of *ex vitro* transplanting, *in vitro* plants showed a low photosynthetic activity, as expected from the culture conditions, which showed a peculiar dependency on leaf conductances to CO<sub>2</sub> diffusion. A high  $g_s$  in *in vitro* plants favoured the carboxylation activity of Rubisco, which was,

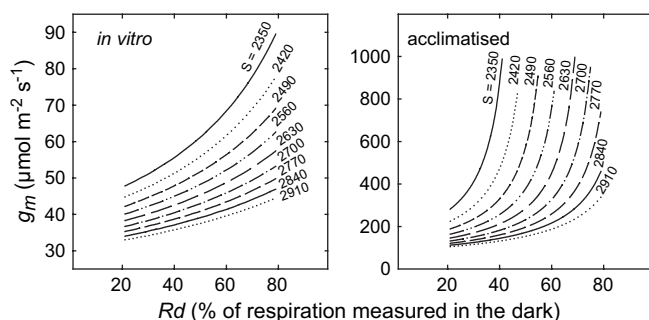

**Fig. 4.** Sensitivity analysis. Relationships between mesophyll conductance ( $g_m$ ) and day respiration ( $R_d$ , expressed as a percentage of dark respiration), plotted for various values of reference Rubisco specificity factor ( $S$ ). Cuticular conductance to CO<sub>2</sub> was held equal to 0.

however, attenuated by a low  $g_m$ , which limited the potential assimilation rate by 14.5%. During acclimatization, the decrease in  $g_s$  was compensated by an increase in  $g_m$  that limited the potential assimilation by only 2.1%.

It is concluded that the characterization of photosynthetic competence in *in vitro* plants could gain accuracy by considering some variables, which are not usually taken into account in the analysis of these systems, such as the diffusion process of CO<sub>2</sub>. The results proved to be important for analysing photosynthesis results, and they could also suggest an alternative target for studies aimed at improving acclimatization protocols. So far, the culture objective was to raise photochemical/biochemical efficiency. It could, instead, be worthwhile exploring the conditions leading to ameliorated leaf CO<sub>2</sub> diffusion efficiency.

## Acknowledgements

The authors are grateful to Professor Gabriel Cornic for his advice during the experiments and for helpful discussions. Thanks are also due to Dr Michael Hodges for critically reading the manuscript, to Dr Massimo Gardiman for his kind assistance in *in vitro* culture techniques, and to Dr Gianni Bellocchi who provided extensive help during statistical analysis. A special thank you goes to JXB editor-in-chief Professor Bill Davies and to the anonymous reviewers for their valuable comments. *In vitro* cultures of grapevine rootstock '41B' were kindly provided by the company Moët-Hennessy Recherche, Epemay (France).

## References

- Arigita L, González A, Sánchez Tamés R. 2002. Influence of CO<sub>2</sub> and sucrose on photosynthesis and transpiration of *Actinidia deliciosa* explants cultured *in vitro*. *Physiologia Plantarum* **115**, 166–173.
- Atkin OK, Evans JR, Ball MC, Lambers H, Pons TL. 2000. Leaf respiration of snow gum in the light and dark: interactions between temperature and irradiance. *Plant Physiology* **122**, 915–923.
- Bota J, Flexas J, Keys AJ, Loveland J, Parry MAJ, Medrano H. 2002. CO<sub>2</sub>/O<sub>2</sub> specificity factor of ribulose-1,5-bisphosphate carboxylase/oxygenase in grapevines (*Vitis vinifera* L.): first *in vitro* determination and comparison to *in vivo* estimations. *Vitis* **41**, 163–168.
- Boyer JS, Wong C, Farquhar GC. 1997. CO<sub>2</sub> and water vapor exchange across leaf cuticle (epidermis) at various water potentials. *Plant Physiology* **114**, 185–191.
- Brooks A, Farquhar GD. 1985. Effect of temperature on the CO<sub>2</sub>/O<sub>2</sub> specificity of ribulose-1,5-bisphosphate carboxylase/oxygenase and the rate of respiration in the light. *Planta* **165**, 397–406.
- Capellades M, Lemeur R, Debergh PC. 1991. Effects of sucrose on starch accumulation and rate of photosynthesis in *Rosa* cultured *in vitro*. *Plant Cell Tissue and Organ Culture* **25**, 21–26.
- Charles G. 1992. *Contrôle du développement chez la pomme de terre (Solanum tuberosum L.) cultivé in vitro: évolution des activités enzymatiques et leur rôle possible dans le processus de la tubérisation*. PhD thesis, Université de Paris-Sud, Laboratoire de Morphogénèse Végétale Expérimentale, Orsay, France.
- Chaves MM. 1994. Environmental constraints to photosynthesis in *ex vitro* plants. In: Lumsden PJ, Nicholas JR, Davies WJ, eds. *Physiology, growth and development of plants in culture*. Dordrecht: Kluwer Academic Publishers, 1–18.
- Cornic G, Briantais J-M. 1991. Partitioning of photosynthetic electron flow between CO<sub>2</sub> and O<sub>2</sub> reduction in a C<sub>3</sub> leaf (*Phaseolus vulgaris* L.) at different CO<sub>2</sub> concentrations and during drought stress. *Planta* **183**, 178–184.
- De Y, Desjardins Y, Lamarre M, Gosselin A. 1992. Photosynthesis and transpiration of *in vitro* cultured asparagus plantlets. *Scientia Horticulturae* **49**, 9–16.
- Desjardins Y, Hdidier C, de Riek J. 1995. Carbon nutrition *in vitro*: regulation and manipulation of carbon assimilation in micro-propagated systems. In: Aitken-Christie J, Kozai T, Smith MAL, eds. *Automation and environmental control in plant tissue culture*. Dordrecht: Kluwer Academic Publishers, 441–471.
- Dietz KJ, Schreiber U, Heber U. 1985. The relationship between the redox state of QA and photosynthesis in leaves at various carbon-dioxide, oxygen and light regimes. *Planta* **166**, 219–226.
- Donnelly DJ, Vidaver WE. 1984. Pigment content and gas exchange of red raspberry *in vitro* and *ex vitro*. *Journal of the American Society for Horticultural Science* **109**, 177–181.
- Epron D, Godard D, Genty B. 1995. Limitation of net CO<sub>2</sub> assimilation rate by internal resistances to CO<sub>2</sub> transfer in the leaves of two tree species (*Fagus sylvatica* L. and *Castanea sativa* Mill.). *Plant, Cell and Environment* **18**, 43–51.
- Fila G, Ghashghaie J, Hoarau J, Cornic G. 1998. Photosynthesis, leaf conductance and water relations of *in vitro* cultured grapevine rootstock in relation to acclimatization. *Physiologia Plantarum* **102**, 411–418.
- Fuchigami LH, Cheng TY, Soeldner A. 1981. Abaxial transpiration and water loss in aseptically cultured plum. *Journal of the American Society for Horticultural Science* **106**, 519–522.
- Genty B, Briantais J-M, Baker NR. 1989. The relationship between the quantum yield of photosynthetic electron transport and quenching of chlorophyll fluorescence. *Biochimica et Biophysica Acta* **990**, 87–92.
- Ghashghaie J, Cornic G. 1994. Effect of temperature on partitioning of photosynthetic electron flow between CO<sub>2</sub> assimilation and O<sub>2</sub> reduction and the CO<sub>2</sub>/O<sub>2</sub> specificity of Rubisco. *Journal of Plant Physiology* **143**, 643–650.
- Grout BW. 1988. Photosynthesis of regenerated plantlets *in vitro* and the stresses of transplanting. *Acta Horticulturae* **230**, 129–135.
- Hdidier C, Desjardins Y. 1994. Effects of sucrose on photosynthesis and phosphoenolpyruvate carboxylase activity of *in vitro* cultured strawberry plantlets. *Plant Cell Tissue and Organ Culture* **36**, 27–33.
- Jones HG. 1973. Limiting factors in photosynthesis. *New Phytologist* **72**, 1089–1094.
- Kerstiens G. 1996. Cuticular water permeability and its physiological significance. *Journal of Experimental Botany* **47**, 1813–1832.
- Kozai T. 1991. Photoautotrophic micropropagation. *In vitro Cellular and Developmental Biology – Plant* **27**, 47–51.
- Lee N, Wetzstein HY, Sommer H. 1985. Effects of quantum flow density on photosynthesis and chloroplast ultrastructure in tissue-cultured plantlets and seedlings of *Liquidambar styraciflua* L. towards improved acclimatization and field survival. *Plant Physiology* **78**, 637–641.
- Lees RP, Evans EH, Nicholas JR. 1991. Photosynthesis in *Clematis* 'The President' during growth *in vitro* and subsequent *in vivo* acclimatization. *Journal of Experimental Botany* **42**, 605–610.
- Long SP, Bernacchi CJ. 2003. Gas exchange measurements, what they can tell us about the underlying limitations to photosynthesis? Procedures and sources of error. *Journal of Experimental Botany* **54**, 2393–2401.



- Long SP, Postl WF, Bolhar-Nordenkamp HR.** 1993. Quantum yield for uptake of carbon dioxide in C<sub>3</sub> vascular plants of contrasting habitats and taxonomic groupings. *Planta* **189**, 226–234.
- Maxwell K, Johnson GN.** 2000. Chlorophyll fluorescence: a practical guide. *Journal of Experimental Botany* **51**, 659–668.
- Moran R.** 1982. Formulae for determination of chlorophyllous pigments extracted with *N,N*-dimethylformamide. *Plant Physiology* **69**, 1376–1381.
- Pospíšilová J, Tichá I, Kadleček P, Haisel D, Plzánková Š.** 1999. Acclimatisation of micropropagated plants to *ex vitro* conditions. *Biologia Plantarum* **42**, 481–497.
- Pospíšilová J, Wilhelmová N, Synková H, Čatský J, Krebs D, Tichá I, Hanáčková B, Snopek J.** 1998. Acclimation of tobacco plantlets to *ex vitro* conditions as affected by application of abscisic acid. *Journal of Experimental Botany* **49**, 863–869.
- Santamaria JM, Kerstiens G.** 1994. The lack of control of water loss in micropropagated plants is not related to poor cuticle development. *Physiologia Plantarum* **91**, 191–195.
- Serret MD, Trillas MI, Matas J, Araus JL.** 1997. The effect of different closure types, light, and sucrose concentrations on carbon isotope composition and growth of *Gardenia jasminoides* plantlets during micropropagation and subsequent acclimation *ex vitro*. *Plant Cell Tissue and Organ Culture* **47**, 217–230.
- Shackel KA, Novello V, Sutter EG.** 1990. Stomatal function and cuticular conductance in whole tissue-cultured apple shoots. *Journal of the American Society for Horticultural Science* **115**, 468–472.
- Singsaas EL, Ort DR, Delucia EH.** 2003. Elevated CO<sub>2</sub> effects on mesophyll conductance and its consequences for interpreting photosynthetic physiology. *Plant, Cell and Environment* **27**, 41–50.
- Solárová J.** 1989. Photosynthesis of plant regenerants: diurnal variation in CO<sub>2</sub> concentration in cultivation vessels resulting from plantlet photosynthetic activity. *Photosynthetica* **23**, 100–107.
- Sutter EG.** 1988. Stomatal and cuticular water loss from apple, cherry, and sweetgum plants after removal from *in vitro* culture. *Journal of the American Society for Horticultural Science* **113**, 234–238.
- Tsuyama M, Shibata M, Kobayashi Y.** 2003. Leaf factors affecting the relationship between chlorophyll fluorescence and the rate of photosynthetic electron transport as determined from CO<sub>2</sub> uptake. *Journal of Plant Physiology* **160**, 1131–1139.
- von Caemmerer S, Farquhar GD.** 1981. Some relationships between the biochemistry of photosynthesis and the gas exchange of leaves. *Planta* **153**, 376–387.
- Wetzstein HY, Sommer HE.** 1982. Scanning electron microscopy of *in vitro*-cultured *Liquidambar styraciflua* plantlets during acclimatization. *Journal of the American Society for Horticultural Science* **108**, 475–480.
